# Supplementary material for: Ethylene Polymerization over Supported Vanadium-Magnesium Catalysts with Different Vanadium Content: The Effect of Hydrogen on Molecular Weight Characteristics of the Produced Bimodal Polyethylene
Source: MDPI journal article supplement (doi:10.3390/catal12090985), 2022-09-01
Supplement: s1 [file s1]

## Supporting Information

# Ethylene polymerization over supported vanadium-magnesium catalysts with different vanadium content: the effect of hydrogen on molecular weight characteristics of the produced bimodal polyethylene

Tatiana Mikenas, <sup>1\*</sup> Peng Guan, <sup>2</sup> Mikhail Matsko, <sup>3</sup> Vladimir Zakharov, <sup>4</sup> Zenghui Zhao <sup>5</sup> and Wei Wu <sup>6</sup>

<sup>1</sup> Boreskov Institute of Catalysis, Siberian Branch of the Russian Academy of Sciences

<sup>2</sup> Novosibirsk National Research University, Russia

<sup>3</sup> Boreskov Institute of Catalysis, Siberian Branch of the Russian Academy of Sciences

<sup>4</sup> Boreskov Institute of Catalysis, Siberian Branch of the Russian Academy of Sciences

<sup>5</sup> China National Petroleum Corporation, Daqing Chemical Research Institute

<sup>6</sup> Heilongjiang University, Harbin, China

\*Correspondence: [mikenas@catalysis.ru](mailto:mikenas@catalysis.ru); Tel.: +7 (383) 3269592, T.B. Mikenas

Decomposition of MWD curves of PE obtained over VMCs with different vanadium content, which were synthesized at different concentrations of hydrogen

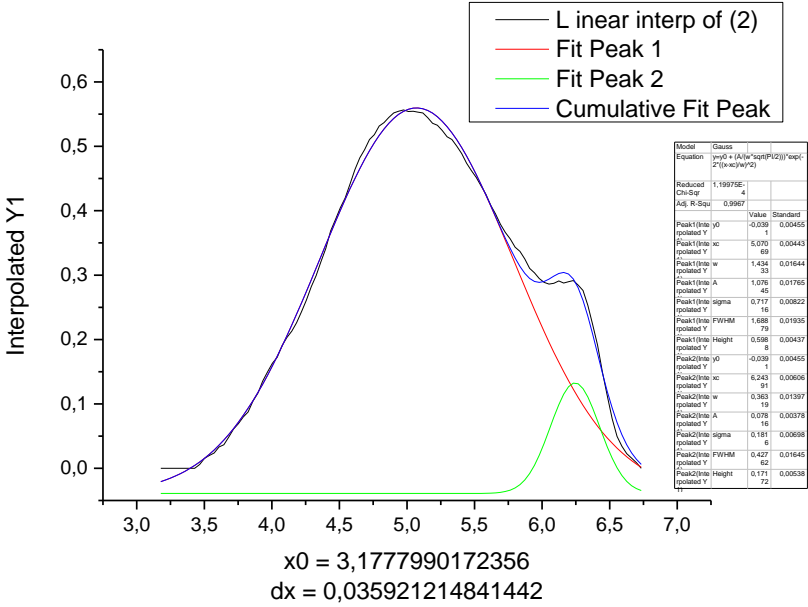

**Figure S1.** Decomposition of the MWD curve of PE obtained over VC1 at  $[H_2]/[C_2H_4]$  (heptane) = 0.0081 (conditions of exp. 2 in Table 1)

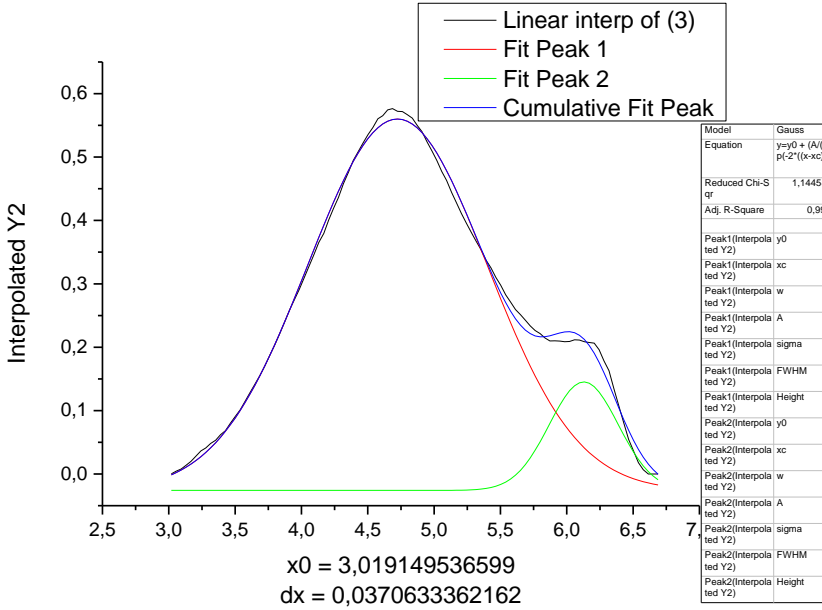

**Figure S2.** Decomposition of the MWD curve of PE obtained over VC1 at  $[H_2]/[C_2H_4]$  (heptane) = 0.0162

(conditions of exp. 3 in Table 1)

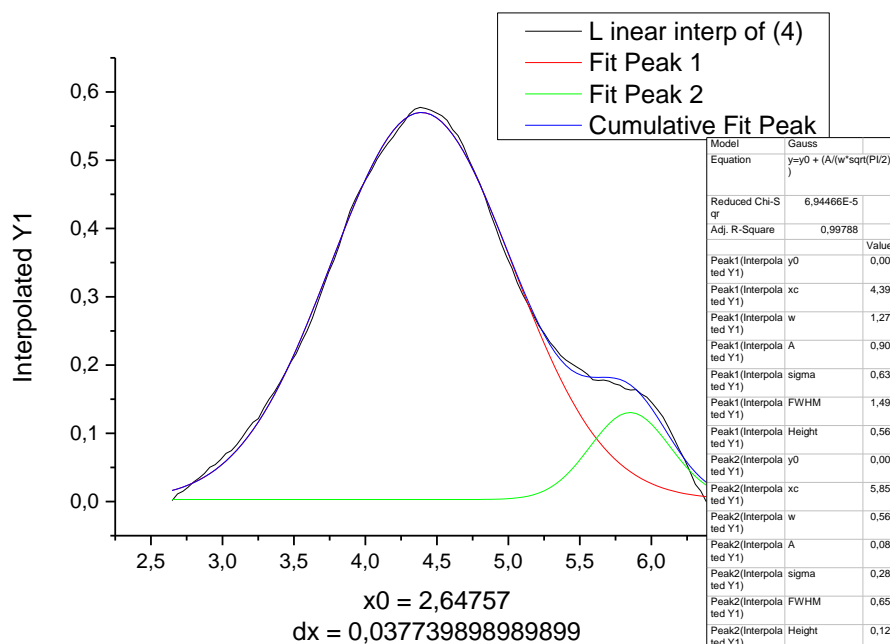

**Figure S3.** Decomposition of the MWD curve of PE obtained over VC1 at  $[H_2]/[C_2H_4]$  (heptane) = 0.0324 (conditions of exp. 4 in Table 1)

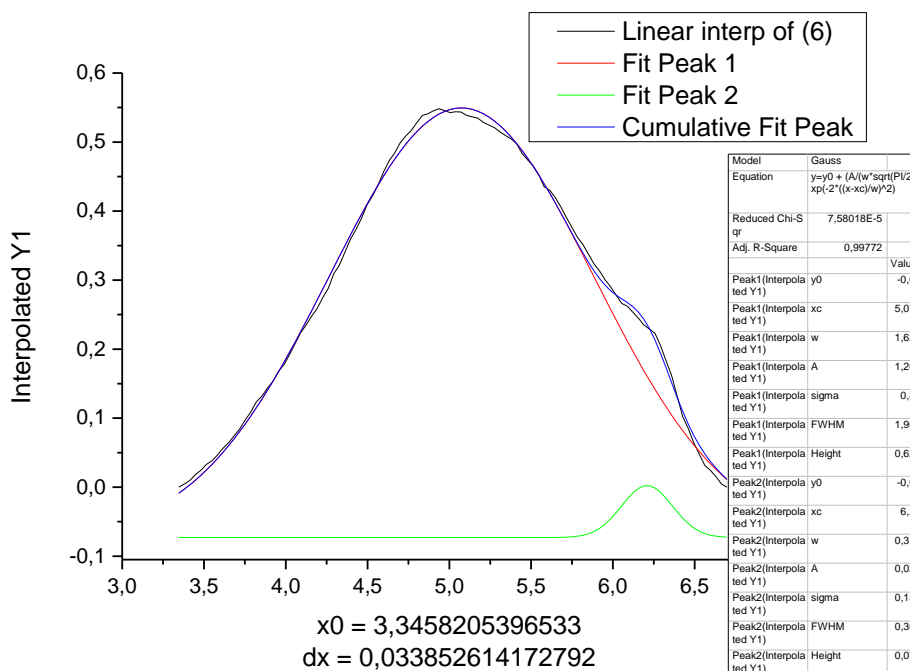

**Figure S4.** Decomposition of the MWD curve of PE obtained over VC2 at  $[H_2]/[C_2H_4]$  (heptane) = 0.0081 (conditions of exp. 6 in Table 1)

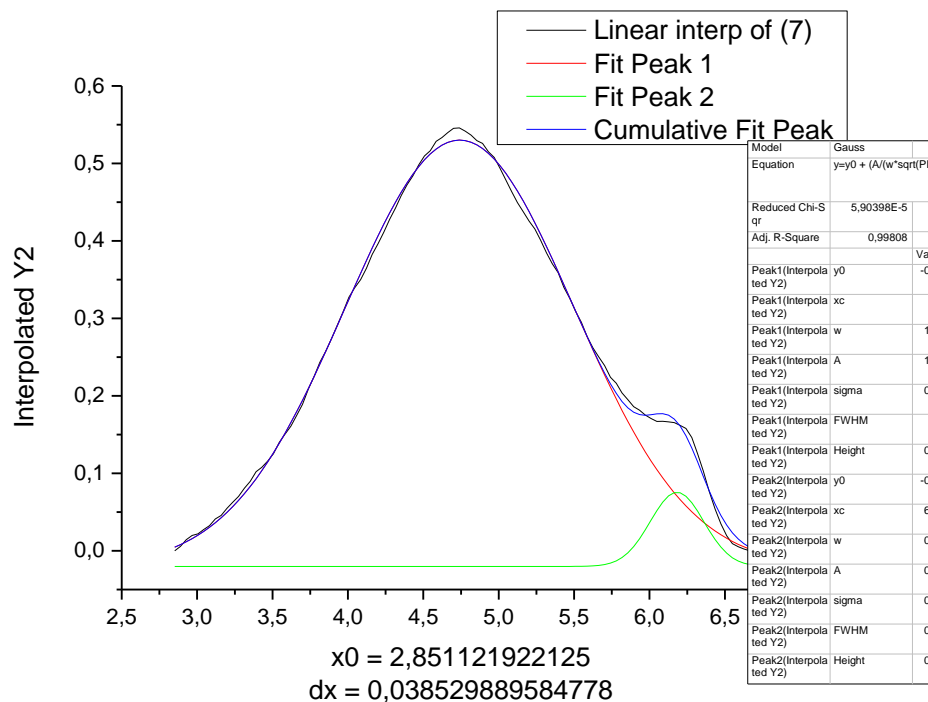

**Figure S5.** Decomposition of the MWD curve of PE obtained over VC2 at  $[H_2]/[C_2H_4]$  (heptane) = 0.0162 (conditions of exp. 7 in Table 1)

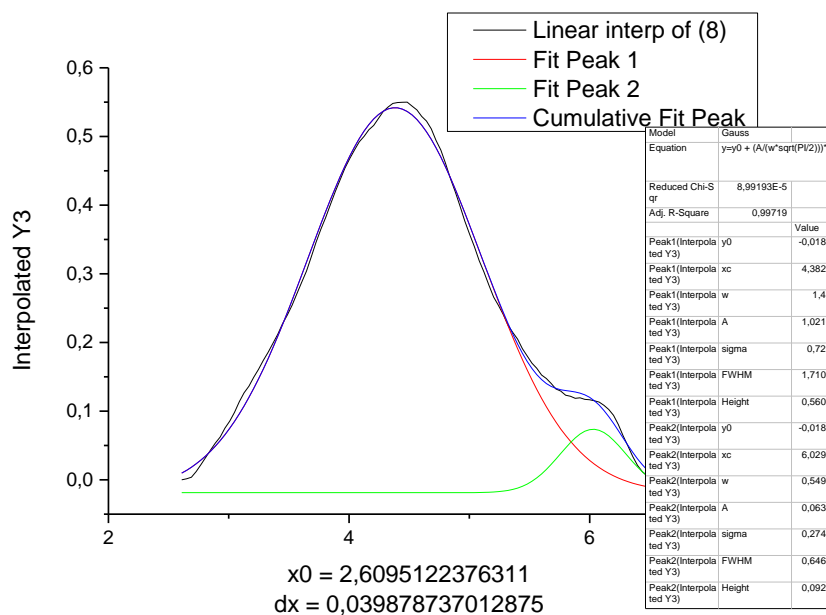

**Figure S6.** Decomposition of the MWD curve of PE obtained over VC2 at  $[H_2]/[C_2H_4]$  (heptane) = 0.0324 (conditions of exp. 8 in Table 1)
